# Supplementary material for: One-step preparation and characterization of a nanostructured hybrid electrode material via a microwave energy-based approach
Source: Royal Society of Chemistry journal article supplement (doi:10.1039/d0nj00604a), 2020-01-01
Supplement: d0nj00604a1.pdf [file d0nj00604a1.pdf]

## ELECTRONIC SUPPLEMENTARY INFORMATION

### One-step preparation and characterization of a nanostructured hybrid electrode material via microwave energy-based approach

Selcuk Poyraz<sup>1</sup>

<sup>1</sup>Department of Textile Engineering, Faculty of Engineering, Adiyaman University, Adiyaman 02040, TURKEY  
E-mail: [spoyraz@adiyaman.edu.tr](mailto:spoyraz@adiyaman.edu.tr)

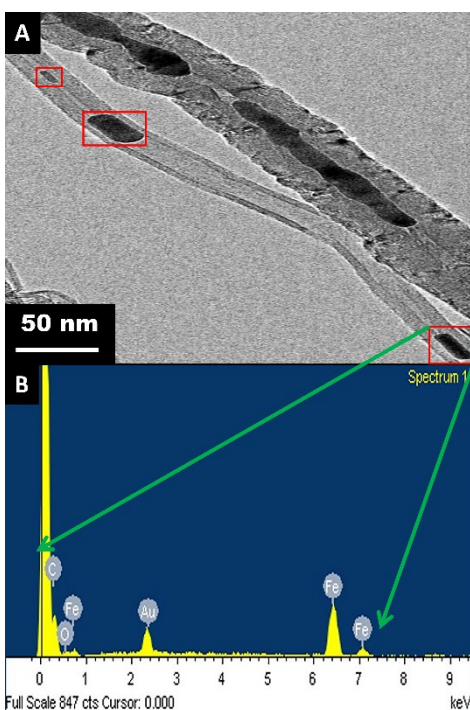

**Figure S1.** EDX spectrum of the oxidized Fe catalyst NPs (indicated in the red rectangular areas) encapsulated inside CNTs' hollow stems in the as-prepared HEMs

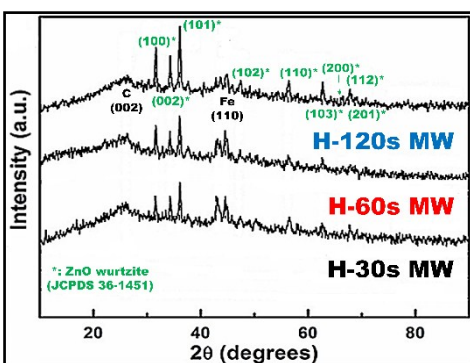

**Figure S2.** XRD spectra of the as-prepared HEMs
